# Supplementary material
Source: publisher site journal article supplement (https://www.dovepress.com/article/344360)
Supplement: Supplementary file 1 [file get_supplementary_file.php]

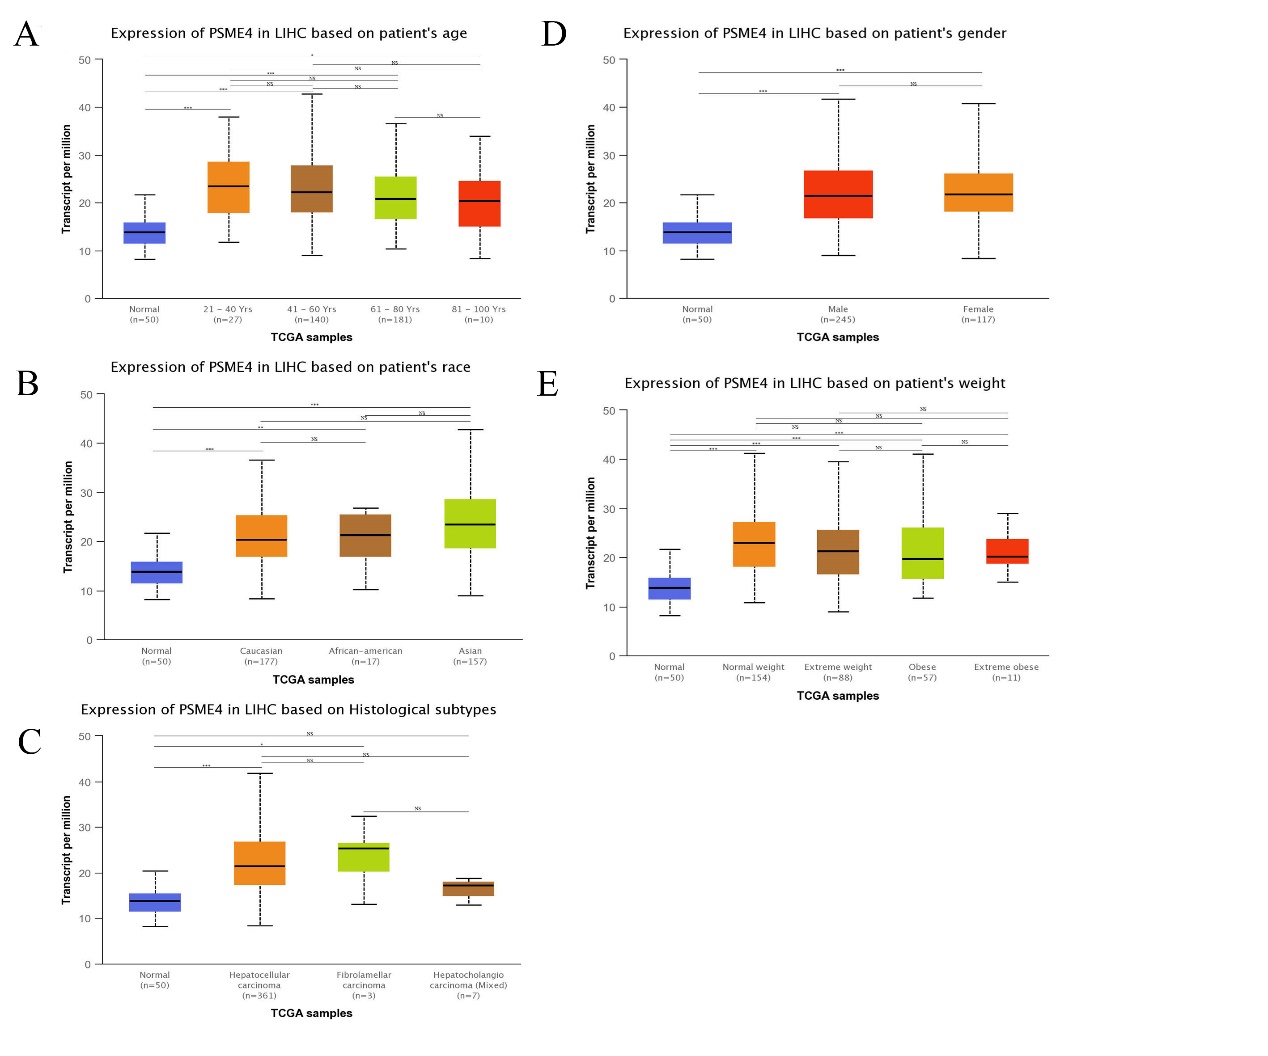


**Supplement Figure 1：**The expression of PSME4 with different ages(A), races(B), histological types(C), genders(D) or weights(E) in TCGA database. ns p≥0.5,*p< 0.05, **p<0.01, ***p<0.001.


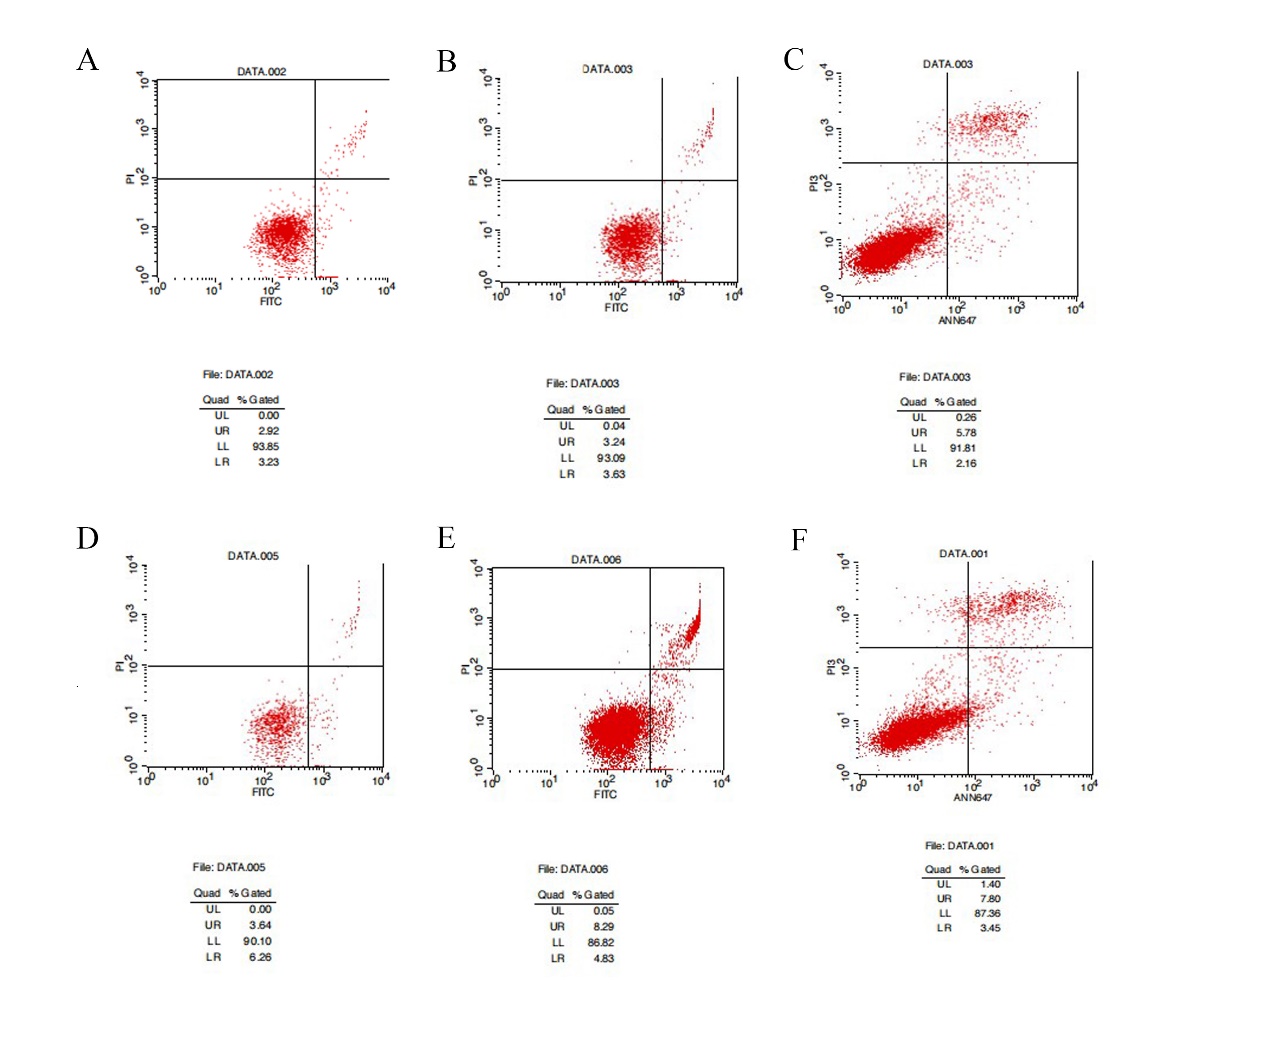


**Supplement Figure 2**: Repeat apoptosis experiments in triplicate by flow cytometry between the control group (A, B, C) and PSME4-siRNA group (D, E, F).


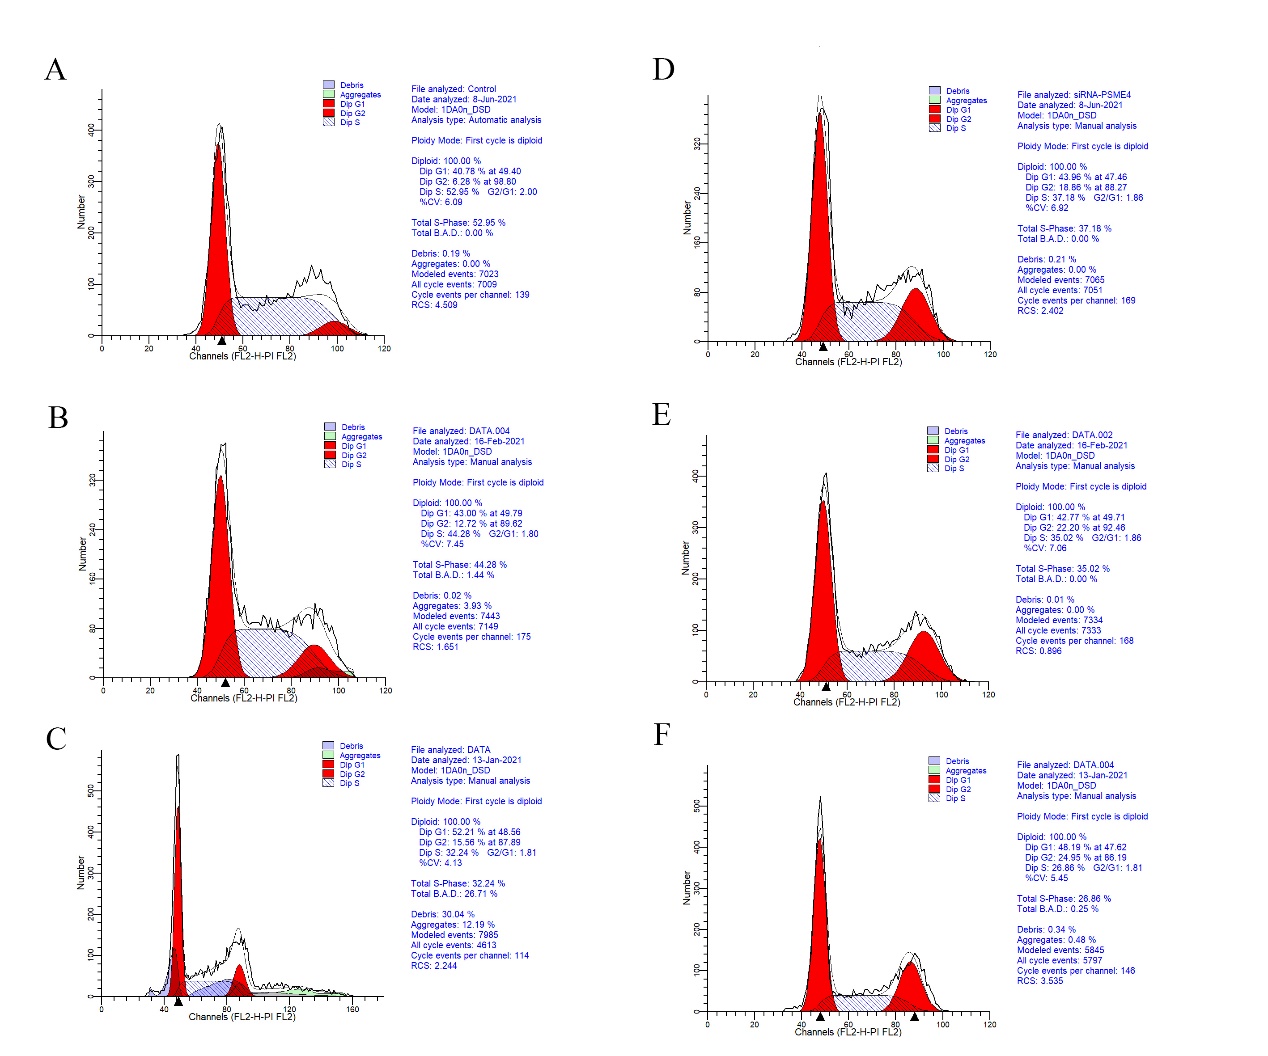


**Supplement Figure 3**: Repeat cell cycle experiments in triplicate by flow cytometry between the control group (A, B, C) and PSME4-siRNA group (D, E, F).
